# Supplementary material
Source: PubMed Central journal article supplement (PMC4278606)
Supplement: PulmCirc-004-462.s001.pdf [file PulmCirc-004-462.s001.pdf]

# Appendix from Francis et al., “Effects of tetrahydrobiopterin oral treatment in hypoxia-induced pulmonary hypertension in rat” (PC, vol. 4, no. 3, p. 462)

## Supplemental material

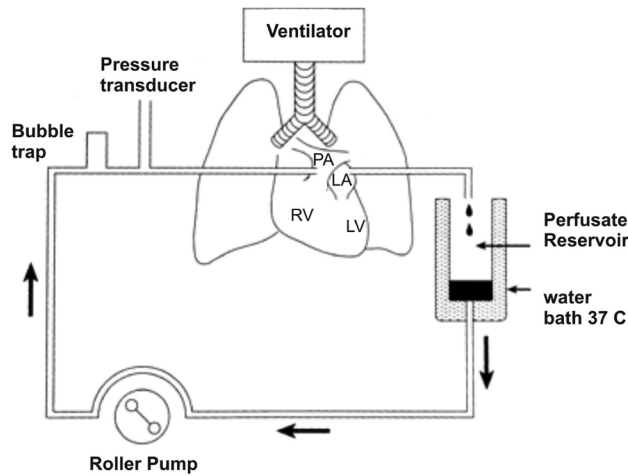

Figure S1. Schematic illustration of the basic components of perfused lung system used in acute pharmacological studies in rats. LA: left atrium; PA: pulmonary artery; RV: right ventricle; LV: left ventricle.

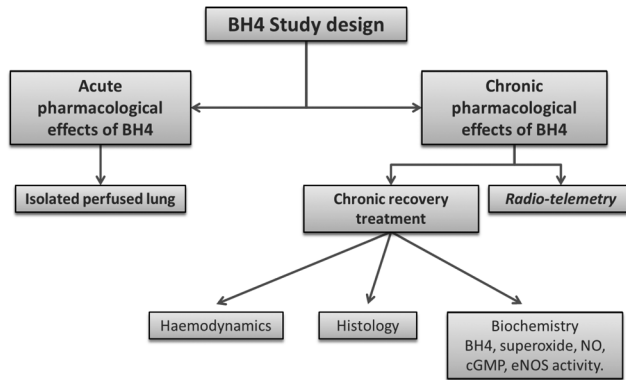

Figure S2. A general diagram showing the overall study design. BH4: tetrahydrobiopterin; cGMP: cyclic guanosine monophosphate; eNOS: endothelial nitric oxide synthase; NO: nitric oxide.

**Table S1.** Measurements of lung tissue tetrahydrobiopterin (BH<sub>4</sub>), dihydrobiopterin (BH<sub>2</sub>), and total biopterin performed by high-performance liquid chromatography followed by serial electrochemical and fluorescent detection

| Variable                                                     | BH <sub>4</sub> (pmol/mg protein) | BH <sub>4</sub> : BH <sub>2</sub> ratio | Total biopterin (pmol/mg protein) |
|--------------------------------------------------------------|-----------------------------------|-----------------------------------------|-----------------------------------|
| Control ( <i>n</i> = 10)                                     | 18.3 ± 7.6                        | 5.1 ± 2.4                               | 22.2 ± 7.8                        |
| Two weeks hypoxia ( <i>n</i> = 5)                            | 28.5 ± 12.2                       | 7.3 ± 2.9                               | 33.2 ± 12.8                       |
| Four weeks hypoxia placebo ( <i>n</i> = 10)                  | 33.3 ± 17.3                       | 4.8 ± 1.7                               | 41.1 ± 21.8                       |
| Four weeks hypoxia BH <sub>4</sub> 10 mg/kg ( <i>n</i> = 5)  | 35.7 ± 19.8                       | 3.4 ± 1.6                               | 45.9 ± 20.9                       |
| Four weeks hypoxia BH <sub>4</sub> 100 mg/kg ( <i>n</i> = 6) | 20.9 ± 17.5                       | 3.1 ± 2.0                               | 27.4 ± 16.8                       |

Note: Total biopterins were quantified by summing BH<sub>4</sub>, BH<sub>2</sub>, and biopterin. Biopterin levels were expressed as picomoles per gram tissue.
